# Supplementary material for: KLF8 promotes tumorigenesis, invasion and metastasis of colorectal cancer cells by transcriptional activation of FHL2
Source: PubMed Central journal article supplement (PMC4694840; doi:10.18632/oncotarget.4517), 2015-07-15
Supplement: oncotarget-06-25402-s001.pdf [file oncotarget-06-25402-s001.pdf]

## SUPPLEMENTARY MATERIALS AND METHODS

### Reagents, cell lines and tissue specimens

Recombinant human TGF- $\beta$ 1 (240-B) and monoclonal anti-TGF- $\beta$ 1 antibody were purchased from R&D Systems (Minneapolis, MN, USA). Mouse anti-human FHL2, used for western blotting, was purchased from MBL International Incorporation (Woburn, Japan). Rabbit anti-human KLF8 antibody, used for western blotting and IHC, was purchased from Aviva Systems Biology (San Diego, CA, USA). Prediluted rabbit anti-human vimentin, N-cadherin and E-cadherin, KLF8 and mouse anti-human glyceraldehyde-3-phosphate dehydrogenase (GAPDH) antibodies, used for western

blotting and/or immunohistochemistry, were purchased from Abcam (Cambridge, UK). Bovine anti-mouse IgG-TR and goat anti-rabbit IgG-FITC antibodies purchased from Santa Cruz (Santa Cruz, CA, USA). Goat anti-rabbit immunoglobulins/HRP, rabbit anti-mouse immunoglobulins/HRP, and normal mouse IgG antibodies were purchased from Dako (Carpinteria, CA, USA).

The human colon cancer cell lines HT29, SW480, SW1116, Caco2, DLD1, SW620 and LoVo were obtained from American Type Culture Collection (ATCC, Rockville, MD, USA) and cultured as previously described [14].

## SUPPLEMENTARY TABLE

Supplementary Table S1: List of the oligonucleotides primers used for amplification and mutation

| Experiment                | Name               | Position or orientation | Sequence (5'-3')                                   |
|---------------------------|--------------------|-------------------------|----------------------------------------------------|
| qRT-PCR                   | E-cadherin         | 550 ~ 570               | F: 5'- TGCCCAGAAAATGAAAAAGG -3'                    |
|                           |                    | 730 ~ 751               | R: 5'- GTGTATGTGGCAATGCGTTC -3'                    |
|                           | HPRT1              | 147 ~ 166               | F: 5'- TGCTCGAGATGTGATGAAGG -3'                    |
|                           |                    | 318 ~ 338               | R: 5'- TCCCCTGTTGACTGGTCATT -3'                    |
| Luciferase constructs     | R                  | -79 ~ -58               | TCCGCTCGAG CGAGGCCTCATATTTTCCAG (Xho I)            |
|                           | pLuc55 (GT-box 1)  | -58 ~ -36               | F: 5' - GGGGTACC GGGGGTGCACAGAGGTGGAGC (Kpn I) -3' |
|                           | pLuc201 (GT-box 2) | -210 ~ -190             | F: 5' - GGGGTACC ACATCCTCTCACCCAAGCAA (Kpn I) -3'  |
|                           | pLuc498 (GT-box 3) | -500 ~ -480             | F: 5' - GGGGTACC ATGGGTGAGTGCCTTTTCAG (Kpn I) -3'  |
| Site-directed mutagenesis | pLuc55-MT          | -58 ~ -36               | F:CCTAATCTGGGGAGTACACAGAGGTGGAGCTGAGCAGCC          |
|                           |                    |                         | R:GGCTGCTCAGCTCCACCTCTGTGTACTCCCCAGATTAGG          |
| ChIP                      | ChIP 1             | L: -145 ~ -125          | ATCCACATTTCAGCTCAC                                 |
|                           |                    | R: 30 ~ 50              | AGGGTGGCTAAACTGGGAAG                               |
|                           | ChIP 2             | L: -306 ~ -286          | GGAGGATAGGGAGGGAGAGA                               |
|                           |                    | R: -102 ~ -83           | CCCAGGAGTGAAAGGACACT                               |
|                           | ChIP 3             | L: -620 ~ -600          | CAGCTGTATCTCTGCCACA                                |
|                           |                    | R: -413 ~ -392          | TTAAAGCCATATGCTGGGAGA                              |
